# Supplementary material
Source: Springer Nature journal article supplement (https://www.springermedizin.de/resource/supplementary/12889_2009_1906_MOESM1_ESM.pdf/9504436)
Supplement: MOESM1 [file 9504436]

## Additional File 1

### Equations of HAART and vaccination strategy

#### HAART strategy

Let  $A_T, A_V$  and  $A_B$  denote the Only-Top, Versatile and Only-Bottom MSM population respectively that were treated. Then we have the following equations for the HAART strategy:

$$\left\{ \begin{array}{l} \frac{dS_T}{dt} = r_T - S_T \left( \frac{\beta_{I_B S_T} I_B + \beta_{I_V S_T} I_V}{\check{N}_B + \check{N}_V} \right) - d_M S_T \\ \frac{dI_T}{dt} = S_T \left( \frac{\beta_{I_B S_T} I_B + \beta_{I_V S_T} I_V}{\check{N}_B + \check{N}_V} \right) - d_I I_T - a I_T \\ \frac{dA_T}{dt} = a I_T - d_A A_T \\ \frac{dS_V}{dt} = r_V - S_V \left( \frac{\beta_{I_T S_V} I_T + \beta_{I_B S_V} I_B + \beta_{I_V S_V} I_V}{\check{N}_T + \check{N}_V + \check{N}_B} \right) - d_M S_V \\ \frac{dI_V}{dt} = S_V \left( \frac{\beta_{I_T S_V} I_T + \beta_{I_B S_V} I_B + \beta_{I_V S_V} I_V}{\check{N}_T + \check{N}_V + \check{N}_B} \right) - d_I I_V - a I_V \\ \frac{dA_V}{dt} = a I_V - d_A A_V \\ \frac{dS_B}{dt} = r_B - S_B \left( \frac{\beta_{I_T S_B} I_T + \beta_{I_V S_B} I_V}{\check{N}_T + \check{N}_V} \right) - d_M S_B \\ \frac{dI_B}{dt} = S_B \left( \frac{\beta_{I_T S_B} I_T + \beta_{I_V S_B} I_V}{\check{N}_T + \check{N}_V} \right) - d_I I_B - a I_B \\ \frac{dA_B}{dt} = a I_B - d_A A_B, \end{array} \right.$$

where  $\check{N}_i = S_i + I_i + A_i$ ,  $i = T, V, B$ .

### Vaccination strategy

Let  $V_T, V_V$  and  $V_B$  denote the Only-Top, Versatile and Only-Bottom MSM population respectively that were vaccinated. Then we have the following equations for the vaccination strategy:

$$\left\{ \begin{array}{l} \frac{dS_T}{dt} = r_T - S_T \left( \frac{\beta_{I_B S_T} I_B + \beta_{I_V S_T} I_V}{\tilde{N}_B + \tilde{N}_V} \right) - d_M S_T - v S_T \\ \frac{dI_T}{dt} = S_T \left( \frac{\beta_{I_B S_T} I_B + \beta_{I_V S_T} I_V}{\tilde{N}_B + \tilde{N}_V} \right) + V_T \left( \frac{\beta_{I_B S_T} I_B + \beta_{I_V S_T} I_V}{\tilde{N}_B + \tilde{N}_V} \right) (1 - \epsilon) - d_I I_T \\ \frac{dV_T}{dt} = v S_T - V_T \left( \frac{\beta_{I_B S_T} I_B + \beta_{I_V S_T} I_V}{\tilde{N}_B + \tilde{N}_V} \right) (1 - \epsilon) - d_M V_T \\ \frac{dS_V}{dt} = r_V - S_V \left( \frac{\beta_{I_T S_V} I_T + \beta_{I_B S_V} I_B + \beta_{I_V S_V} I_V}{\tilde{N}_T + \tilde{N}_V + \tilde{N}_B} \right) - d_M S_V - v S_V \\ \frac{dI_V}{dt} = S_V \left( \frac{\beta_{I_T S_V} I_T + \beta_{I_B S_V} I_B + \beta_{I_V S_V} I_V}{\tilde{N}_T + \tilde{N}_V + \tilde{N}_B} \right) \\ \quad + V_V \left( \frac{\beta_{I_T S_V} I_T + \beta_{I_B S_V} I_B + \beta_{I_V S_V} I_V}{\tilde{N}_T + \tilde{N}_V + \tilde{N}_B} \right) (1 - \epsilon) - d_I I_V \\ \frac{dV_V}{dt} = v S_V - V_V \left( \frac{\beta_{I_T S_V} I_T + \beta_{I_B S_V} I_B + \beta_{I_V S_V} I_V}{\tilde{N}_T + \tilde{N}_V + \tilde{N}_B} \right) (1 - \epsilon) - d_M V_V \\ \frac{dS_B}{dt} = r_B - S_B \left( \frac{\beta_{I_T S_B} I_T + \beta_{I_V S_B} I_V}{\tilde{N}_T + \tilde{N}_V} \right) - d_M S_B - v S_B \\ \frac{dI_B}{dt} = S_B \left( \frac{\beta_{I_T S_B} I_T + \beta_{I_V S_B} I_V}{\tilde{N}_T + \tilde{N}_V} \right) + V_B \left( \frac{\beta_{I_T S_B} I_T + \beta_{I_V S_B} I_V}{\tilde{N}_T + \tilde{N}_V} \right) (1 - \epsilon) - d_I I_B \\ \frac{dV_B}{dt} = v S_B - V_B \left( \frac{\beta_{I_T S_B} I_T + \beta_{I_V S_B} I_V}{\tilde{N}_T + \tilde{N}_V} \right) (1 - \epsilon) - d_M V_B \end{array} \right.$$

where  $\tilde{N}_i = S_i + I_i + V_i$ ,  $i = T, V, B$  and  $\epsilon$  is the vaccine efficacy, satisfying  $0 \leq \epsilon \leq 1$ .

## The persistence of HIV infection

To study the persistence of infection, we discuss the equivalent system of our model as follows:

$$\left\{ \begin{array}{l} \frac{dI_T}{dt} = (N_T - I_T) \left( \frac{\beta_{I_B S_T} I_B + \beta_{I_V S_T} I_V}{N_B + N_V} \right) - d_I I_T \\ \frac{dN_T}{dt} = r_T - d_M N_T - (d_I - d_M) I_T \\ \frac{dI_V}{dt} = (N_V - I_V) \left( \frac{\beta_{I_T S_V} I_T + \beta_{I_B S_V} I_B + \beta_{I_V S_V} I_V}{N_T + N_V + N_B} \right) - d_I I_V \\ \frac{dN_V}{dt} = r_V - d_M N_V - (d_I - d_M) I_V \\ \frac{dI_B}{dt} = (N_B - I_B) \left( \frac{\beta_{I_T S_B} I_T + \beta_{I_V S_B} I_V}{N_T + N_V} \right) - d_I I_B \\ \frac{dN_B}{dt} = r_B - d_M N_B - (d_I - d_M) I_B. \end{array} \right. \quad (1)$$

The positive invariant domain of system (1) is

$$D = \{(I_i, N_i) : 0 \leq I_i \leq N_i, 0 \leq N_i \leq K_i\}, \quad i = T, V, B$$

and the disease-free equilibrium is

$$E_0 = (I_T^0, N_T^0, I_V^0, N_V^0, I_B^0, N_B^0) = \left( 0, \frac{r_T}{d_M}, 0, \frac{r_V}{d_M}, 0, \frac{r_B}{d_M} \right).$$

First, we introduce some basic definitions and a lemma that will be useful for our discussion. More definitions and results about persistence can be found in [1].

Let  $X$  be a locally compact metric space, with metric  $d$ . Let  $X$  be the disjoint union of two sets  $X_1$  and  $X_2$  such that  $X_2$  is compact. Let  $\Phi$  be a continuous semi-flow on  $X_1$ . An invariant subset  $M$  of  $X$  is said to be isolated if  $M$  is the maximal invariant set in some neighborhood of itself. Let  $A$  and  $B$  be two isolated invariant sets.  $A$  is chained to  $B$  ( $A \rightarrow B$ ) if there is a full orbit through  $x$  which is not either in  $A$  or in  $B$ , such that  $\omega(x) \subset B, \alpha(x) \subset A$ . Moreover, a finite sequence  $\{M_1, M_2, \dots, M_k\}$  of invariant sets is also called a chain if  $M_1 \rightarrow M_2 \rightarrow \dots \rightarrow M_k$ . The chain is called cyclic if  $M_k = M_1$ . Otherwise, it is called acyclic.

**Lemma 1 (Proposition 4.3 in [1]).** *Let  $X$  be locally compact,  $X_2$  be compact in  $X$  and  $X_1$  be forward invariant under the continuous semiflow  $\Phi$  on  $X$ . Let  $x_n$  be a sequence of elements in  $X_1$  satisfying*

$$\lim_{t \rightarrow \infty} \sup d(\Phi_t(x_n), X_2) \rightarrow 0, \quad n \rightarrow \infty.$$

*Let  $M = \cup_{k=1}^m M_k$  be an isolated covering of  $\Omega_2$  such that  $\omega(x_n)$  not belong to  $M_k$  for all  $n, k$ . Then  $M$  is cyclic.*

Then for the persistence of infection, we have the following Theorem.

**Theorem 1.** *When  $R_0 > 1$ , system (1) is uniformly persistent of infection, i.e., there exists  $\varepsilon > 0$  for system (1), such that*

$$\liminf_{t \rightarrow \infty} \min\{I_T(t), I_V(t), I_B(t)\} > \varepsilon,$$

for any solution  $x(t)$  with  $N_T(0) > 0, N_V(0) > 0, N_B(0) > 0$  and any one of the three initial conditions holds:  $I_T(0) > 0, I_V(0) > 0$  or  $I_B(0) > 0$ .

**Proof.** First we calculate the Jacobian matrix of system (1) at  $E_0$ . It is more convenient to change the order of coordinates to  $I_T, I_V, I_B, N_T, N_V, N_B$  to study the Jacobian matrix.

The Jacobian matrix can be written as follows

$$J|_{E_0} = \begin{bmatrix} J_{LT} & 0 \\ J_{LB} & J_{RB} \end{bmatrix},$$

where

$$J_{LT} = \begin{bmatrix} -d_I & \frac{r_T \beta_{VT}}{r_B + r_V} & \frac{r_T \beta_{BT}}{r_B + r_V} \\ \frac{r_V \beta_{TV}}{r_T + r_V + r_B} & \frac{r_V \beta_{VV}}{r_T + r_V + r_B} - d_I & \frac{r_V \beta_{BV}}{r_T + r_V + r_B} \\ \frac{r_B \beta_{TB}}{r_T + r_V} & \frac{r_B \beta_{VB}}{r_T + r_V} & -d_I \end{bmatrix},$$

$$J_{LB} = \begin{bmatrix} -(d_I - d_M) & 0 & 0 \\ 0 & -(d_I - d_M) & 0 \\ 0 & 0 & -(d_I - d_M) \end{bmatrix}$$

and

$$J_{RB} = \begin{bmatrix} -d_M & 0 & 0 \\ 0 & -d_M & 0 \\ 0 & 0 & -d_M \end{bmatrix}.$$

Define

$$\begin{aligned} D_2 &= \{(I_T, N_T, I_V, N_V, I_B, N_B) | I_T = 0, \text{ or } I_V = 0, \text{ or } I_B = 0, 0 \leq N_i \leq K_i\}, \\ D_1 &= D \setminus D_2, \\ \tilde{D}_1 &= \{(I_T, N_T, I_V, N_V, I_B, N_B) | 0 < I_i < N_i, 0 < N_i \leq K_i\} \end{aligned}$$

where  $i = T, V, B$  respectively, and  $D_1$  and  $\tilde{D}_1$  are forward invariant.

Let  $x^0 = (I_T(0), N_T(0), I_V(0), N_V(0), I_B(0), N_B(0))$ . From system (1) and the assumptions ( $N_i(0) > 0$  and at least any one of  $I_i(0) > 0, i = T, V, B$  holds), it is easy to get that  $\Phi_t(x^0) \in \tilde{D}_1$  for all  $t > 0$ . So we can then assume  $x_0 \in \tilde{D}_1$ .

Define  $\Omega_2 = \cup_{x \in D_2} \omega(x)$ . It is easy to see that  $\Omega_2 = \{E_0\}$ . Then we will prove the following:

1.  $\{E_0\}$  is a weak repeller for  $\tilde{D}_1$ ;
2.  $D_2$  is a uniform weak repeller for  $\tilde{D}_1$ ;
3.  $D_2$  is a uniform strong repeller for  $\tilde{D}_1$ .

First, let's prove that  $\{E_0\}$  is a weak repeller for  $\tilde{D}_1$ . Suppose  $x(t) (= \Phi_t(x^0))$  stays in a small neighborhood of  $E_0$ . Then we have two cases:

1. if  $I_T(0) = I_V(0) = I_B(0) = 0$ , then  $I_T(t) = I_V(t) = I_B(t) \equiv 0$ . System (1) shows that  $(N_T(t), N_V(t), N_B(t))$  goes far away from  $E_0$  as  $t \rightarrow -\infty$ .
2. if  $I_T(0) > 0$ , or  $I_V(0) > 0$ , or  $I_B(0) > 0$  holds, then  $I_T(t) > 0, I_V(t) > 0$  and  $I_B(t) > 0$  for all  $t > 0$ . When  $x(t)$  stays very close to  $E_0$ , by system (1), we know that there exists some  $\delta > 0$  which is related to the size of the neighborhood of  $E_0$ , such that

$$\frac{dX}{dt} > J_\delta X, \quad (2)$$

where

$$J_\delta = \begin{bmatrix} J_{LT}^{11} - \delta & J_{LT}^{12} - \delta & J_{LT}^{13} - \delta \\ J_{LT}^{21} - \delta & J_{LT}^{22} - \delta & J_{LT}^{23} - \delta \\ J_{LT}^{31} - \delta & J_{LT}^{32} - \delta & J_{LT}^{33} - \delta \end{bmatrix}.$$

$J_{LT}^{ij} (i, j = 1, 2, 3)$  are the entries of the top-left matrix  $J_{LT}$  of the matrix  $J|_{E_0}$ . Since  $R_0 > 1$ , then by choosing  $\delta$  small enough,  $J_\delta$  has positive non-diagonal elements and its largest eigenvalue is positive.

Hence, the solutions of the linear quasi-monotonic system

$$\frac{dY}{dt} = J_\delta Y,$$

where

$$Y = [ y_1, \quad y_2, \quad y_3 ]^T,$$

with  $y_1(0) > 0, y_2(0) > 0, y_3(0) > 0$  are exponentially increasing as  $t \rightarrow \infty$ . By the comparison principle,  $(I_T(t), I_V(t), I_B(t))$  goes far away from  $(0, 0, 0)$ .

From the above two cases,  $\{E_0\}$  is isolated in  $D$  and it cannot be chained to itself in  $D_2$ , i.e.,  $\{E_0\}$  is an acyclic covering for  $\Omega_2$ . From the proof of case 2 we know that  $\{E_0\}$  is a weak repeller for  $\tilde{D}_1$ .

Second, let's prove that  $D_2$  is a uniform weak repeller for  $\tilde{D}_1$ . If  $D_2$  is not a uniform weak repeller for  $\tilde{D}_1$ , then we can find a sequence

$$x_n = (I_{Tn}, N_{Tn}, I_{Vn}, N_{Vn}, I_{Bn}, N_{Bn}) \in \tilde{D}_1 \subset D_1,$$

satisfying

$$\limsup_{t \rightarrow \infty} d(\Phi_t(x_n), D_2) \rightarrow 0, \quad n \rightarrow \infty.$$

As  $\{E_0\}$  is a weak repeller for  $\tilde{D}_1$ , we have  $\omega(x_n)$  not belong to  $\{E_0\}$  for all  $n$ . Using Lemma 1, we get that  $\{E_0\}$  should be cyclic, which is contrary to our discussion above. So  $D_2$  is a uniform weak repeller for  $\tilde{D}_1$ ; i.e., there exists  $\tilde{\varepsilon} > 0$  such that

$$\limsup_{t \rightarrow \infty} \min\{I_T(t), I_V(t), I_B(t)\} > \tilde{\varepsilon} \quad (3)$$

for any solution  $x(t)$  with  $I_i(0) > 0, i = T, V, B$ .

Finally, let's prove that  $D_2$  is a uniform strong repeller for  $\tilde{D}_1$ . Suppose that  $D_2$  is not a uniform strong repeller for  $\tilde{D}_1$ . Then there exist sequences

$$x_j^0 = (I_T^j(0), N_T^j(0), I_V^j(0), N_V^j(0), I_B^j(0), N_B^j(0)) \in \tilde{D}_1$$

and  $0 < \varepsilon_j < \tilde{\varepsilon}$ , such that

$$\liminf_{t \rightarrow \infty} \min\{I_T^j(t), I_V^j(t), I_B^j(t)\} < \varepsilon_j \quad \text{for } j = 1, 2, \dots \quad (4)$$

Here,  $\lim_{t \rightarrow \infty} \varepsilon_j = 0$  and  $(I_T^j(t), N_T^j(t), I_V^j(t), N_V^j(t), I_B^j(t), N_B^j(t))$  are the solutions of system (1) with initial values  $x_j^0 \in \tilde{D}_1$ .

From (3) and (4) we can find sequences  $0 < r_j < s_j < t_j$  with  $\lim_{j \rightarrow \infty} r_j = \infty$  such that

$$\lim_{j \rightarrow \infty} \min\{I_T^j(s_j), I_V^j(s_j), I_B^j(s_j)\} = 0, \quad (5)$$

$$\min\{I_T^j(r_j), I_V^j(r_j), I_B^j(r_j)\} = \min\{I_T^j(t_j), I_V^j(t_j), I_B^j(t_j)\} = \tilde{\varepsilon} \quad (6)$$

and

$$\min\{I_T^j(r_j), I_V^j(r_j), I_B^j(r_j)\} \leq \tilde{\varepsilon} \quad \text{for } r_j \leq t \leq t_j. \quad (7)$$

Now, for sequence  $(I_T^j(r_j), N_T^j(r_j), I_V^j(r_j), N_V^j(r_j), I_B^j(r_j), N_B^j(r_j))$ , which is convergent, from (6) we say it converges to

$$(I_T^*(0), N_T^*(0), I_V^*(0), N_V^*(0), I_B^*(0), N_B^*(0)) = x^*(0) \in \tilde{D}_1$$

when  $j \rightarrow \infty$ .

Now we prove that  $t_j - r_j$  is unbounded when  $j \rightarrow \infty$ . Suppose it is not true. Then, after taking a subsequence,  $s_j - r_j$  converge to  $s^*$  when  $j \rightarrow \infty$ .

Let  $x^*(t)$  denote the solution of system (1) with initial value  $x^*(0) \in \tilde{D}_1$ . Then, according to the basic properties of flow and the fact that  $\tilde{D}_1$  is invariant, we have

$$+s^*), \lim_{j \rightarrow \infty} (I_i^j(r_j + s^*), N_i^j(r_j + s^*)) = x^*(s^*) \in \tilde{D}_1, \quad i = T, V, B. \quad (8)$$

From (5), we have

$$\lim_{j \rightarrow \infty} (I_T^j(s_j), N_T^j(s_j), I_V^j(s_j), N_V^j(s_j), I_B^j(s_j), N_B^j(s_j)) = x^*(s^*) \in D_2, \quad (9)$$

which is a contradiction. So we say  $t_j - r_j$  is unbounded when  $j \rightarrow \infty$ .

Now let  $x^*(0) \in \tilde{D}_1$ . Then, from (3), we have

$$\limsup_{t \rightarrow \infty} \min\{I_T^*(t), I_V^*(t), I_B^*(t)\} > \tilde{\varepsilon}. \quad (10)$$

In fact, from the above discussion case 2, we know that the inequality (10) always holds when  $x^*(0) \in D_1$ .

Since  $t_j - r_j$  is unbounded, we also can assume that it is increasing monotonically (we can realize this by choosing a subsequence) and  $\lim_{j \rightarrow \infty} t_j - r_j = \infty$ . So when  $k > j$  and  $0 \leq r \leq t_j - r_j$ , we have

$$\min\{I_i^k(r_k + r)\} \leq \tilde{\varepsilon}, \quad i = T, V, B.$$

Now fix  $r$  and  $j$  and let  $j \rightarrow \infty$ . We have

$$\min\{I_i^*(r)\} = \lim_{k \rightarrow \infty} \min\{I_i^k(r_k + r)\} \leq \tilde{\varepsilon}, \quad i = T, V, B. \quad (11)$$

In fact, (11) holds for all  $r \geq 0$  since  $t_j - r_j$  is unbounded when  $j$  tends to infinity. This is contrary to (10).

So  $D_2$  is a uniform strong repeller for  $\tilde{D}_1$ . This finishes the proof.

Since  $N_i \geq I_i, i = T, V, B$ , then, from the strong uniform persistence of infection, we can get the strong uniform persistence of populations. Finally, we can obtain the strong uniform persistence of (1) relatively to all components.

**Theorem 2** *When  $R_0 > 1$ , then there exists  $\varepsilon > 0$  for system (1) such that, for any solutions  $x(t)$  with initial values  $N_T(0) > 0, N_V(0) > 0, N_B(0) > 0$  and  $I_T(0) > 0, I_V(0) > 0$ , or  $I_B(0) > 0$ , we have*

$$\liminf_{t \rightarrow \infty} \min\{I_T(t), N_T(t), I_V(t), N_V(t), I_B(t), N_B(t)\} > \varepsilon.$$

According to a general result from persistence theory, we can get the existence of the disease equilibrium for system (1).

**Theorem 3** *When  $R_0 > 1$ , there exists at least one disease equilibrium of system (1).*

From the results above, we get that, when  $R_0 > 1$ , HIV will be spread in the MSM population so long as one infected individual is introduced in this population, regardless of whether he is an Only-Top, a Versatile or an Only-Bottom.

## References

1. Thieme HR, **Persistence under relaxed point- dissipativity (with application to an endemic model)**. *SIAM J. Math. Anal.* 1993, **24**: 407–435.
